# Supplementary material
Source: publisher figshare collection journal article supplement (https://gsajournals.figshare.com/ndownloader/files/21488931)
Supplement: Supplementary file 1 [file 21488931]

## Sheet: GN2016
Name	Rep	Range	Block	Row	AUDPC	Location
DRIL78.001	1	25	4	6	595	GN2016
DRIL78.002	1	22	25	27	425	GN2016
DRIL78.003	1	24	11	57	595	GN2016
DRIL78.004	1	25	5	20	765	GN2016
DRIL78.005	1	23	16	4	552.5	GN2016
DRIL78.006	1	22	24	45	765	GN2016
DRIL78.007	1	24	15	4	850	GN2016
DRIL78.008	1	22	22	72	765	GN2016
DRIL78.009	1	26	3	4	680	GN2016
DRIL78.010	1	23	21	68	467.5	GN2016
DRIL78.011	1	24	14	19	722.5	GN2016
DRIL78.012	1	25	8	55	935	GN2016
DRIL78.013	1	25	8	56	892.5	GN2016
DRIL78.014	1	23	17	21	467.5	GN2016
DRIL78.015	1	23	17	24	637.5	GN2016
DRIL78.016	1	22	22	73	807.5	GN2016
DRIL78.017	1	22	25	29	765	GN2016
DRIL78.018	1	22	25	35	637.5	GN2016
DRIL78.019	1	22	23	53	722.5	GN2016
DRIL78.020	1	25	4	9	552.5	GN2016
DRIL78.021	1	23	20	51	765	GN2016
DRIL78.022	1	24	14	24	722.5	GN2016
DRIL78.023	1	22	26	24	595	GN2016
DRIL78.024	1	25	9	66	552.5	GN2016
DRIL78.025	1	23	19	48	680	GN2016
DRIL78.026	1	26	3	11	467.5	GN2016
DRIL78.027	1	24	11	58	NA	GN2016
DRIL78.028	1	23	17	19	552.5	GN2016
DRIL78.029	1	25	6	27	595	GN2016
DRIL78.030	1	26	1	35	467.5	GN2016
DRIL78.031	1	25	5	15	595	GN2016
DRIL78.032	1	24	10	66	680	GN2016
DRIL78.033	1	24	13	34	467.5	GN2016
DRIL78.034	1	25	9	69	637.5	GN2016
DRIL78.035	1	23	20	54	637.5	GN2016
DRIL78.036	1	26	3	13	510	GN2016
DRIL78.037	1	26	1	30	467.5	GN2016
DRIL78.038	1	25	4	5	510	GN2016
DRIL78.039	1	25	9	68	807.5	GN2016
DRIL78.040	1	23	18	38	595	GN2016
DRIL78.041	1	23	21	70	722.5	GN2016
DRIL78.042	1	25	6	28	680	GN2016
DRIL78.043	1	23	18	31	722.5	GN2016
DRIL78.044	1	25	7	50	425	GN2016
DRIL78.045	1	25	6	33	467.5	GN2016
DRIL78.046	1	22	22	71	850	GN2016
DRIL78.047	1	25	6	36	850	GN2016
DRIL78.048	1	25	4	12	807.5	GN2016
DRIL78.049	1	25	9	71	552.5	GN2016
DRIL78.050	1	22	24	49	722.5	GN2016
DRIL78.051	1	23	17	20	425	GN2016
DRIL78.052	1	22	24	41	722.5	GN2016
DRIL78.053	1	23	16	6	722.5	GN2016
DRIL78.054	1	24	11	61	765	GN2016
DRIL78.055	1	22	24	39	467.5	GN2016
DRIL78.056	1	25	8	60	637.5	GN2016
DRIL78.057	1	26	2	25	510	GN2016
DRIL78.058	1	24	14	17	467.5	GN2016
DRIL78.059	1	24	10	73	765	GN2016
DRIL78.060	1	25	4	8	722.5	GN2016
DRIL78.061	1	23	19	50	722.5	GN2016
DRIL78.062	1	24	12	50	722.5	GN2016
DRIL78.063	1	24	14	23	467.5	GN2016
DRIL78.064	1	23	18	36	722.5	GN2016
DRIL78.065	1	23	21	67	765	GN2016
DRIL78.066	1	22	23	52	467.5	GN2016
DRIL78.067	1	24	10	74	510	GN2016
DRIL78.068	1	26	2	22	467.5	GN2016
DRIL78.069	1	24	13	37	595	GN2016
DRIL78.070	1	23	17	23	807.5	GN2016
DRIL78.071	1	23	18	30	NA	GN2016
DRIL78.072	1	26	2	17	510	GN2016
DRIL78.073	1	25	7	43	595	GN2016
DRIL78.074	1	22	22	64	680	GN2016
DRIL78.075	1	25	9	73	467.5	GN2016
DRIL78.076	1	25	7	44	765	GN2016
DRIL78.077	1	22	26	23	765	GN2016
DRIL78.078	1	22	24	48	807.5	GN2016
DRIL78.079	1	22	26	22	680	GN2016
DRIL78.080	1	26	3	10	552.5	GN2016
DRIL78.081	1	25	6	31	807.5	GN2016
DRIL78.082	1	22	22	70	637.5	GN2016
DRIL78.083	1	24	13	29	595	GN2016
DRIL78.084	1	23	17	16	637.5	GN2016
DRIL78.085	1	25	5	25	510	GN2016
DRIL78.086	1	26	2	26	1190	GN2016
DRIL78.087	1	23	21	65	722.5	GN2016
DRIL78.088	1	23	17	18	722.5	GN2016
DRIL78.089	1	23	19	39	467.5	GN2016
DRIL78.090	1	25	5	22	722.5	GN2016
DRIL78.091	1	26	3	3	467.5	GN2016
DRIL78.092	1	23	18	34	807.5	GN2016
DRIL78.093	1	24	15	14	680	GN2016
DRIL78.094	1	23	19	45	552.5	GN2016
DRIL78.095	1	23	20	59	637.5	GN2016
DRIL78.096	1	24	12	47	722.5	GN2016
DRIL78.097	1	22	23	54	807.5	GN2016
DRIL78.098	1	23	19	49	765	GN2016
DRIL78.099	1	25	9	67	467.5	GN2016
DRIL78.100	1	24	10	63	297.5	GN2016
DRIL78.101	1	24	12	45	1402.5	GN2016
DRIL78.102	1	23	21	63	1275	GN2016
DRIL78.103	1	23	20	52	765	GN2016
DRIL78.104	1	23	19	42	595	GN2016
DRIL78.105	1	22	23	55	255	GN2016
DRIL78.106	1	23	18	33	NA	GN2016
DRIL78.107	1	24	11	56	NA	GN2016
DRIL78.108	1	24	13	32	425	GN2016
DRIL78.109	1	26	1	34	552.5	GN2016
DRIL78.110	1	25	5	21	765	GN2016
DRIL78.111	1	22	26	26	NA	GN2016
DRIL78.112	1	24	13	27	892.5	GN2016
DRIL78.113	1	23	16	5	850	GN2016
DRIL78.114	1	24	13	35	NA	GN2016
DRIL78.115	1	23	20	61	722.5	GN2016
DRIL78.116	1	25	8	62	595	GN2016
DRIL78.117	1	24	14	15	722.5	GN2016
DRIL78.118	1	25	7	49	510	GN2016
DRIL78.119	1	24	11	53	1105	GN2016
DRIL78.120	1	26	1	36	510	GN2016
DRIL78.121	1	23	16	12	807.5	GN2016
DRIL78.122	1	24	15	10	382.5	GN2016
DRIL78.123	1	22	22	68	722.5	GN2016
DRIL78.124	1	23	21	71	892.5	GN2016
DRIL78.125	1	26	2	24	510	GN2016
DRIL78.126	1	25	7	46	382.5	GN2016
DRIL78.127	1	24	15	9	467.5	GN2016
DRIL78.128	1	22	26	19	722.5	GN2016
DRIL78.129	1	22	23	62	595	GN2016
DRIL78.130	1	26	3	14	552.5	GN2016
DRIL78.131	1	25	6	34	552.5	GN2016
DRIL78.132	1	24	14	18	425	GN2016
DRIL78.133	1	23	17	25	595	GN2016
DRIL78.134	1	22	23	59	340	GN2016
DRIL78.135	1	24	10	68	552.5	GN2016
DRIL78.136	1	22	24	40	807.5	GN2016
DRIL78.137	1	24	10	64	765	GN2016
DRIL78.138	1	24	11	60	722.5	GN2016
DRIL78.139	1	23	20	58	722.5	GN2016
DRIL78.140	1	24	12	49	765	GN2016
DRIL78.141	1	22	25	28	510	GN2016
DRIL78.142	1	26	2	19	680	GN2016
DRIL78.143	1	23	20	56	892.5	GN2016
DRIL78.144	1	24	10	67	637.5	GN2016
DRIL78.145	1	23	20	62	892.5	GN2016
DRIL78.146	1	24	14	26	850	GN2016
DRIL78.147	1	23	17	17	637.5	GN2016
DRIL78.148	1	22	23	61	425	GN2016
DRIL78.149	1	25	9	70	637.5	GN2016
DRIL78.150	1	24	11	54	NA	GN2016
DRIL78.151	1	22	25	36	637.5	GN2016
DRIL78.152	1	25	8	59	552.5	GN2016
DRIL78.153	1	23	16	13	722.5	GN2016
DRIL78.154	1	22	23	60	680	GN2016
DRIL78.155	1	26	1	28	NA	GN2016
DRIL78.156	1	25	7	42	680	GN2016
DRIL78.157	1	24	12	40	850	GN2016
DRIL78.158	1	25	4	11	595	GN2016
DRIL78.159	1	22	22	63	765	GN2016
DRIL78.160	1	22	22	66	722.5	GN2016
DRIL78.161	1	22	26	25	595	GN2016
DRIL78.162	1	22	26	17	680	GN2016
DRIL78.163	1	24	10	71	510	GN2016
DRIL78.164	1	22	22	74	510	GN2016
DRIL78.165	1	23	16	9	935	GN2016
DRIL78.166	1	23	16	3	722.5	GN2016
DRIL78.167	1	23	19	46	552.5	GN2016
DRIL78.168	1	22	22	67	595	GN2016
DRIL78.169	1	25	5	26	510	GN2016
DRIL78.170	1	22	25	33	595	GN2016
DRIL78.171	1	23	16	8	850	GN2016
DRIL78.172	1	24	12	43	850	GN2016
DRIL78.173	1	25	9	74	595	GN2016
DRIL78.174	1	26	1	29	382.5	GN2016
DRIL78.175	1	25	9	63	297.5	GN2016
DRIL78.176	1	23	18	28	722.5	GN2016
DRIL78.177	1	26	1	38	510	GN2016
DRIL78.178	1	22	24	43	680	GN2016
DRIL78.179	1	25	5	16	467.5	GN2016
DRIL78.180	1	24	11	55	510	GN2016
DRIL78.181	1	26	2	16	425	GN2016
DRIL78.182	1	24	14	16	850	GN2016
DRIL78.183	1	24	11	59	NA	GN2016
DRIL78.184	1	22	26	18	680	GN2016
DRIL78.185	1	24	12	48	722.5	GN2016
DRIL78.186	1	22	24	44	1062.5	GN2016
DRIL78.187	1	25	5	19	722.5	GN2016
DRIL78.188	1	22	25	38	722.5	GN2016
DRIL78.189	1	23	21	69	510	GN2016
DRIL78.190	1	26	3	6	340	GN2016
DRIL78.191	1	25	7	41	425	GN2016
DRIL78.192	1	24	10	72	765	GN2016
DRIL78.193	1	25	7	40	467.5	GN2016
DRIL78.194	1	24	15	11	552.5	GN2016
DRIL78.195	1	26	3	9	425	GN2016
DRIL78.196	1	23	19	44	467.5	GN2016
DRIL78.197	1	24	15	12	637.5	GN2016
DRIL78.198	1	25	4	10	680	GN2016
DRIL78.199	1	23	16	7	637.5	GN2016
DRIL78.200	1	23	20	55	552.5	GN2016
DRIL78.201	1	24	13	28	340	GN2016
DRIL78.202	1	26	2	15	297.5	GN2016
DRIL78.203	1	24	15	7	850	GN2016
DRIL78.204	1	24	12	39	467.5	GN2016
DRIL78.205	1	26	1	27	552.5	GN2016
DRIL78.206	1	25	4	7	892.5	GN2016
DRIL78.207	1	23	21	74	680	GN2016
DRIL78.208	1	22	24	42	595	GN2016
DRIL78.209	1	24	13	33	722.5	GN2016
DRIL78.210	1	26	3	12	297.5	GN2016
DRIL78.211	1	25	6	37	510	GN2016
DRIL78.212	1	24	14	25	212.5	GN2016
DRIL78.213	1	23	19	40	765	GN2016
DRIL78.214	1	22	25	31	892.5	GN2016
DRIL78.215	1	22	26	20	850	GN2016
DRIL78.216	1	24	12	44	425	GN2016
DRIL78.217	1	24	15	3	382.5	GN2016
DRIL78.218	1	24	10	69	935	GN2016
DRIL78.219	1	25	4	4	425	GN2016
DRIL78.220	1	25	6	30	510	GN2016
DRIL78.221	1	22	25	30	892.5	GN2016
DRIL78.222	1	25	9	65	892.5	GN2016
DRIL78.223	1	25	8	54	510	GN2016
DRIL78.224	1	23	18	35	977.5	GN2016
DRIL78.225	1	26	3	7	467.5	GN2016
DRIL78.226	1	25	7	47	425	GN2016
DRIL78.227	1	22	25	34	850	GN2016
DRIL78.228	1	23	17	15	382.5	GN2016
DRIL78.229	1	25	7	39	425	GN2016
DRIL78.230	1	23	20	57	850	GN2016
DRIL78.231	1	25	8	52	850	GN2016
DRIL78.232	1	26	2	18	467.5	GN2016
DRIL78.233	1	24	15	5	425	GN2016
DRIL78.234	1	24	11	51	637.5	GN2016
DRIL78.235	1	23	18	32	552.5	GN2016
DRIL78.236	1	26	2	20	510	GN2016
DRIL78.237	1	22	26	16	807.5	GN2016
DRIL78.238	1	22	23	58	807.5	GN2016
DRIL78.239	1	24	12	46	340	GN2016
DRIL78.240	1	22	23	57	255	GN2016
DRIL78.241	1	25	8	53	510	GN2016
DRIL78.242	1	24	13	31	1147.5	GN2016
DRIL78.243	1	23	16	11	765	GN2016
DRIL78.244	1	22	24	46	NA	GN2016
DRIL78.245	1	24	14	22	595	GN2016
DRIL78.246	1	25	5	23	595	GN2016
DRIL78.247	1	25	8	51	425	GN2016
DRIL78.248	1	23	21	72	892.5	GN2016
DRIL78.249	1	24	15	6	425	GN2016
DRIL78.250	1	25	8	58	1062.5	GN2016
DRIL78.251	1	25	4	13	382.5	GN2016
DRIL78.252	1	23	19	43	382.5	GN2016
DRIL78.253	1	23	18	27	552.5	GN2016
DRIL78.254	1	23	21	64	467.5	GN2016
DRIL78.255	1	26	1	33	467.5	GN2016
DRIL78.256	1	24	13	36	212.5	GN2016
DRIL78.257	1	25	6	35	297.5	GN2016
DRIL78.258	1	25	5	17	595	GN2016
DRIL78.259	1	26	1	37	595	GN2016
DRIL78.260	1	25	6	29	425	GN2016
NC344	1	26	1	32	85	GN2016
NC344	1	26	2	23	127.5	GN2016
NC344	1	26	3	5	127.5	GN2016
NC344	1	25	4	3	127.5	GN2016
NC344	1	25	5	24	85	GN2016
NC344	1	25	6	32	127.5	GN2016
NC344	1	25	7	45	85	GN2016
NC344	1	25	8	57	170	GN2016
NC344	1	25	9	64	170	GN2016
NC344	1	24	10	65	127.5	GN2016
NC344	1	24	11	62	170	GN2016
NC344	1	24	12	42	85	GN2016
NC344	1	24	13	38	127.5	GN2016
NC344	1	24	14	21	255	GN2016
NC344	1	24	15	8	127.5	GN2016
NC344	1	23	16	14	127.5	GN2016
NC344	1	23	17	22	170	GN2016
NC344	1	23	18	29	212.5	GN2016
NC344	1	23	19	47	170	GN2016
NC344	1	23	20	60	170	GN2016
NC344	1	23	21	73	212.5	GN2016
NC344	1	22	22	65	170	GN2016
NC344	1	22	23	56	NA	GN2016
NC344	1	22	24	50	85	GN2016
NC344	1	22	25	37	170	GN2016
NC344	1	22	26	21	127.5	GN2016
Oh7B	1	26	1	31	510	GN2016
Oh7B	1	26	2	21	510	GN2016
Oh7B	1	26	3	8	467.5	GN2016
Oh7B	1	25	4	14	680	GN2016
Oh7B	1	25	5	18	595	GN2016
Oh7B	1	25	6	38	510	GN2016
Oh7B	1	25	7	48	552.5	GN2016
Oh7B	1	25	8	61	637.5	GN2016
Oh7B	1	25	9	72	680	GN2016
Oh7B	1	24	10	70	722.5	GN2016
Oh7B	1	24	11	52	1147.5	GN2016
Oh7B	1	24	12	41	892.5	GN2016
Oh7B	1	24	13	30	637.5	GN2016
Oh7B	1	24	14	20	595	GN2016
Oh7B	1	24	15	13	680	GN2016
Oh7B	1	23	16	10	637.5	GN2016
Oh7B	1	23	17	26	807.5	GN2016
Oh7B	1	23	18	37	722.5	GN2016
Oh7B	1	23	19	41	680	GN2016
Oh7B	1	23	20	53	637.5	GN2016
Oh7B	1	23	21	66	765	GN2016
Oh7B	1	22	22	69	807.5	GN2016
Oh7B	1	22	23	51	892.5	GN2016
Oh7B	1	22	24	47	892.5	GN2016
Oh7B	1	22	25	32	765	GN2016
Oh7B	1	22	26	15	765	GN2016

## Sheet: GN17Urbana
Name	Rep	Range	Block	Row	AUDPC	Location
DRIL78.001	1	7	10	4	NA	GN17Urbana
DRIL78.001	2	10	26	60	307.5	GN17Urbana
DRIL78.002	1	5	5	72	117.5	GN17Urbana
DRIL78.002	2	11	34	67	280	GN17Urbana
DRIL78.003	1	5	3	39	415	GN17Urbana
DRIL78.003	2	10	29	13	280	GN17Urbana
DRIL78.004	1	6	9	24	615	GN17Urbana
DRIL78.004	2	12	35	76	515	GN17Urbana
DRIL78.005	1	8	18	28	307.5	GN17Urbana
DRIL78.005	2	11	32	43	325	GN17Urbana
DRIL78.006	1	6	9	28	525	GN17Urbana
DRIL78.006	2	10	28	27	335	GN17Urbana
DRIL78.007	1	8	16	59	622.5	GN17Urbana
DRIL78.007	2	8	19	18	515	GN17Urbana
DRIL78.008	1	8	18	35	560	GN17Urbana
DRIL78.008	2	10	26	59	290	GN17Urbana
DRIL78.009	1	5	3	40	470	GN17Urbana
DRIL78.009	2	8	19	13	370	GN17Urbana
DRIL78.010	1	5	1	11	352.5	GN17Urbana
DRIL78.010	2	9	22	38	290	GN17Urbana
DRIL78.011	1	7	11	13	207.5	GN17Urbana
DRIL78.011	2	11	34	65	352.5	GN17Urbana
DRIL78.012	1	5	4	58	507.5	GN17Urbana
DRIL78.012	2	9	24	66	852.5	GN17Urbana
DRIL78.013	1	6	5	76	380	GN17Urbana
DRIL78.013	2	9	22	31	307.5	GN17Urbana
DRIL78.014	1	5	5	69	325	GN17Urbana
DRIL78.014	2	8	19	22	252.5	GN17Urbana
DRIL78.015	1	8	16	67	487.5	GN17Urbana
DRIL78.015	2	9	24	70	397.5	GN17Urbana
DRIL78.016	1	7	15	74	100	GN17Urbana
DRIL78.016	2	11	34	73	542.5	GN17Urbana
DRIL78.017	1	7	12	27	315	GN17Urbana
DRIL78.017	2	9	24	61	352.5	GN17Urbana
DRIL78.018	1	8	15	76	325	GN17Urbana
DRIL78.018	2	9	22	30	370	GN17Urbana
DRIL78.019	1	7	13	51	290	GN17Urbana
DRIL78.019	2	11	33	59	505	GN17Urbana
DRIL78.020	1	8	16	68	397.5	GN17Urbana
DRIL78.020	2	11	34	62	370	GN17Urbana
DRIL78.021	1	5	3	38	550	GN17Urbana
DRIL78.021	2	10	26	54	300	GN17Urbana
DRIL78.022	1	6	9	16	470	GN17Urbana
DRIL78.022	2	9	21	16	515	GN17Urbana
DRIL78.023	1	8	16	64	632.5	GN17Urbana
DRIL78.023	2	11	32	42	560	GN17Urbana
DRIL78.024	1	7	12	33	352.5	GN17Urbana
DRIL78.024	2	9	23	50	245	GN17Urbana
DRIL78.025	1	6	8	38	677.5	GN17Urbana
DRIL78.025	2	11	30	5	705	GN17Urbana
DRIL78.026	1	8	17	51	577.5	GN17Urbana
DRIL78.026	2	9	21	14	370	GN17Urbana
DRIL78.027	1	8	18	39	567.5	GN17Urbana
DRIL78.027	2	9	21	22	342.5	GN17Urbana
DRIL78.028	1	7	10	6	190	GN17Urbana
DRIL78.028	2	9	23	45	207.5	GN17Urbana
DRIL78.029	1	8	18	32	325	GN17Urbana
DRIL78.029	2	10	29	11	162.5	GN17Urbana
DRIL78.030	1	8	17	52	605	GN17Urbana
DRIL78.030	2	8	19	16	425	GN17Urbana
DRIL78.031	1	7	11	15	415	GN17Urbana
DRIL78.031	2	8	19	23	505	GN17Urbana
DRIL78.032	1	6	9	26	380	GN17Urbana
DRIL78.032	2	10	30	4	NA	GN17Urbana
DRIL78.033	1	5	5	73	117.5	GN17Urbana
DRIL78.033	2	10	27	44	145	GN17Urbana
DRIL78.034	1	5	4	53	560	GN17Urbana
DRIL78.034	2	10	27	43	252.5	GN17Urbana
DRIL78.035	1	6	10	8	262.5	GN17Urbana
DRIL78.035	2	11	34	68	370	GN17Urbana
DRIL78.036	1	5	2	28	632.5	GN17Urbana
DRIL78.036	2	11	31	28	1042.5	GN17Urbana
DRIL78.037	1	6	9	27	425	GN17Urbana
DRIL78.037	2	9	22	29	297.5	GN17Urbana
DRIL78.038	1	5	1	16	317.5	GN17Urbana
DRIL78.038	2	12	35	68	290	GN17Urbana
DRIL78.039	1	7	14	54	425	GN17Urbana
DRIL78.039	2	10	28	29	452.5	GN17Urbana
DRIL78.040	1	5	1	6	425	GN17Urbana
DRIL78.040	2	9	25	73	425	GN17Urbana
DRIL78.041	1	6	6	73	345	GN17Urbana
DRIL78.041	2	10	27	50	307.5	GN17Urbana
DRIL78.043	1	6	10	5	442.5	GN17Urbana
DRIL78.043	2	11	32	41	587.5	GN17Urbana
DRIL78.044	1	5	3	43	360	GN17Urbana
DRIL78.044	2	12	36	50	380	GN17Urbana
DRIL78.045	1	8	17	54	NA	GN17Urbana
DRIL78.045	2	9	20	5	NA	GN17Urbana
DRIL78.046	1	7	15	70	245	GN17Urbana
DRIL78.046	2	12	36	55	587.5	GN17Urbana
DRIL78.047	1	8	16	60	487.5	GN17Urbana
DRIL78.047	2	10	25	69	270	GN17Urbana
DRIL78.048	1	6	9	23	660	GN17Urbana
DRIL78.048	2	11	31	19	605	GN17Urbana
DRIL78.049	1	7	14	61	227.5	GN17Urbana
DRIL78.049	2	11	33	58	487.5	GN17Urbana
DRIL78.050	1	5	2	31	227.5	GN17Urbana
DRIL78.050	2	10	28	23	217.5	GN17Urbana
DRIL78.051	1	7	13	49	145	GN17Urbana
DRIL78.051	2	11	32	32	280	GN17Urbana
DRIL78.052	1	6	7	56	480	GN17Urbana
DRIL78.052	2	9	22	28	397.5	GN17Urbana
DRIL78.053	1	7	14	63	190	GN17Urbana
DRIL78.053	2	11	32	37	515	GN17Urbana
DRIL78.054	1	8	16	66	697.5	GN17Urbana
DRIL78.054	2	9	21	18	515	GN17Urbana
DRIL78.055	1	5	2	20	532.5	GN17Urbana
DRIL78.055	2	12	35	65	577.5	GN17Urbana
DRIL78.056	1	5	3	44	262.5	GN17Urbana
DRIL78.056	2	10	25	76	NA	GN17Urbana
DRIL78.057	1	6	7	50	460	GN17Urbana
DRIL78.057	2	11	31	18	415	GN17Urbana
DRIL78.058	1	6	8	41	470	GN17Urbana
DRIL78.058	2	9	21	19	370	GN17Urbana
DRIL78.059	1	7	12	36	470	GN17Urbana
DRIL78.059	2	11	30	11	570	GN17Urbana
DRIL78.060	1	5	2	25	825	GN17Urbana
DRIL78.060	2	12	36	58	597.5	GN17Urbana
DRIL78.061	1	6	6	69	480	GN17Urbana
DRIL78.061	2	11	32	36	615	GN17Urbana
DRIL78.062	1	8	17	45	890	GN17Urbana
DRIL78.062	2	9	23	43	317.5	GN17Urbana
DRIL78.063	1	5	4	57	515	GN17Urbana
DRIL78.063	2	10	28	31	345	GN17Urbana
DRIL78.064	1	5	3	36	477.5	GN17Urbana
DRIL78.064	2	9	22	36	262.5	GN17Urbana
DRIL78.065	1	7	13	43	352.5	GN17Urbana
DRIL78.065	2	9	21	25	325	GN17Urbana
DRIL78.066	1	8	15	72	362.5	GN17Urbana
DRIL78.066	2	9	25	75	280	GN17Urbana
DRIL78.067	1	6	9	19	487.5	GN17Urbana
DRIL78.067	2	11	34	72	442.5	GN17Urbana
DRIL78.068	1	5	5	65	487.5	GN17Urbana
DRIL78.068	2	10	26	63	145	GN17Urbana
DRIL78.069	1	7	11	16	442.5	GN17Urbana
DRIL78.069	2	12	35	69	362.5	GN17Urbana
DRIL78.070	1	5	2	32	505	GN17Urbana
DRIL78.070	2	10	27	47	425	GN17Urbana
DRIL78.071	1	8	17	46	705	GN17Urbana
DRIL78.071	2	11	31	20	587.5	GN17Urbana
DRIL78.072	1	6	6	70	380	GN17Urbana
DRIL78.072	2	11	34	70	370	GN17Urbana
DRIL78.073	1	7	14	56	235	GN17Urbana
DRIL78.073	2	9	21	20	325	GN17Urbana
DRIL78.074	1	6	7	57	300	GN17Urbana
DRIL78.074	2	11	32	35	487.5	GN17Urbana
DRIL78.075	1	8	16	63	NA	GN17Urbana
DRIL78.075	2	9	22	32	NA	GN17Urbana
DRIL78.076	1	8	16	65	625	GN17Urbana
DRIL78.076	2	10	27	42	297.5	GN17Urbana
DRIL78.077	1	6	8	36	NA	GN17Urbana
DRIL78.077	2	11	32	39	460	GN17Urbana
DRIL78.078	1	7	11	10	100	GN17Urbana
DRIL78.078	2	12	36	60	235	GN17Urbana
DRIL78.079	1	6	9	17	470	GN17Urbana
DRIL78.079	2	12	36	49	532.5	GN17Urbana
DRIL78.080	1	8	17	49	587.5	GN17Urbana
DRIL78.080	2	12	35	71	487.5	GN17Urbana
DRIL78.082	1	7	12	29	172.5	GN17Urbana
DRIL78.082	2	9	21	21	397.5	GN17Urbana
DRIL78.083	1	7	14	57	127.5	GN17Urbana
DRIL78.083	2	12	35	66	NA	GN17Urbana
DRIL78.084	1	6	6	71	380	GN17Urbana
DRIL78.084	2	10	28	32	352.5	GN17Urbana
DRIL78.085	1	7	10	5	235	GN17Urbana
DRIL78.085	2	8	19	21	415	GN17Urbana
DRIL78.086	1	7	13	44	370	GN17Urbana
DRIL78.086	2	9	24	68	425	GN17Urbana
DRIL78.087	1	7	14	58	270	GN17Urbana
DRIL78.087	2	11	30	14	560	GN17Urbana
DRIL78.089	1	5	4	62	217.5	GN17Urbana
DRIL78.089	2	10	29	9	NA	GN17Urbana
DRIL78.091	1	6	6	67	307.5	GN17Urbana
DRIL78.091	2	12	35	73	542.5	GN17Urbana
DRIL78.092	1	7	14	65	272.5	GN17Urbana
DRIL78.092	2	12	36	51	542.5	GN17Urbana
DRIL78.093	1	5	3	47	515	GN17Urbana
DRIL78.093	2	11	34	63	505	GN17Urbana
DRIL78.094	1	8	18	29	370	GN17Urbana
DRIL78.094	2	11	34	64	342.5	GN17Urbana
DRIL78.095	1	6	8	40	397.5	GN17Urbana
DRIL78.095	2	10	28	33	225	GN17Urbana
DRIL78.096	1	6	6	65	390	GN17Urbana
DRIL78.096	2	9	22	40	352.5	GN17Urbana
DRIL78.097	1	6	7	52	507.5	GN17Urbana
DRIL78.097	2	10	25	75	117.5	GN17Urbana
DRIL78.098	1	5	5	70	290	GN17Urbana
DRIL78.098	2	12	36	54	687.5	GN17Urbana
DRIL78.099	1	5	2	22	190	GN17Urbana
DRIL78.099	2	10	25	74	45	GN17Urbana
DRIL78.100	1	8	16	61	470	GN17Urbana
DRIL78.100	2	9	23	51	235	GN17Urbana
DRIL78.101	1	7	11	14	397.5	GN17Urbana
DRIL78.101	2	11	30	7	760	GN17Urbana
DRIL78.102	1	7	15	76	117.5	GN17Urbana
DRIL78.102	2	10	26	64	307.5	GN17Urbana
DRIL78.103	1	8	16	62	560	GN17Urbana
DRIL78.103	2	12	36	52	515	GN17Urbana
DRIL78.104	1	8	16	57	415	GN17Urbana
DRIL78.104	2	8	20	8	342.5	GN17Urbana
DRIL78.105	1	7	13	47	262.5	GN17Urbana
DRIL78.105	2	10	26	65	62.5	GN17Urbana
DRIL78.106	1	5	1	15	207.5	GN17Urbana
DRIL78.106	2	8	19	12	280	GN17Urbana
DRIL78.107	1	6	7	48	217.5	GN17Urbana
DRIL78.107	2	12	36	59	280	GN17Urbana
DRIL78.108	1	7	14	64	155	GN17Urbana
DRIL78.108	2	10	25	71	290	GN17Urbana
DRIL78.109	1	6	9	21	397.5	GN17Urbana
DRIL78.109	2	8	19	24	632.5	GN17Urbana
DRIL78.110	1	5	3	41	560	GN17Urbana
DRIL78.110	2	11	31	17	660	GN17Urbana
DRIL78.111	1	7	11	9	127.5	GN17Urbana
DRIL78.111	2	11	31	21	397.5	GN17Urbana
DRIL78.112	1	5	1	12	532.5	GN17Urbana
DRIL78.112	2	12	36	56	470	GN17Urbana
DRIL78.113	1	8	15	75	325	GN17Urbana
DRIL78.113	2	11	33	48	442.5	GN17Urbana
DRIL78.114	1	5	4	54	715	GN17Urbana
DRIL78.114	2	12	35	67	925	GN17Urbana
DRIL78.115	1	5	5	76	245	GN17Urbana
DRIL78.115	2	9	24	65	307.5	GN17Urbana
DRIL78.116	1	6	8	42	297.5	GN17Urbana
DRIL78.116	2	10	26	58	145	GN17Urbana
DRIL78.117	1	5	3	45	522.5	GN17Urbana
DRIL78.117	2	11	33	54	677.5	GN17Urbana
DRIL78.118	1	5	3	42	715	GN17Urbana
DRIL78.118	2	11	32	40	715	GN17Urbana
DRIL78.121	1	7	11	17	425	GN17Urbana
DRIL78.121	2	11	33	55	487.5	GN17Urbana
DRIL78.122	1	5	5	74	117.5	GN17Urbana
DRIL78.122	2	10	29	12	190	GN17Urbana
DRIL78.123	1	5	4	56	515	GN17Urbana
DRIL78.123	2	11	32	38	560	GN17Urbana
DRIL78.124	1	7	11	11	252.5	GN17Urbana
DRIL78.124	2	10	27	39	380	GN17Urbana
DRIL78.125	1	6	8	32	715	GN17Urbana
DRIL78.125	2	11	33	51	362.5	GN17Urbana
DRIL78.126	1	6	6	63	NA	GN17Urbana
DRIL78.126	2	10	26	61	NA	GN17Urbana
DRIL78.127	1	6	7	51	415	GN17Urbana
DRIL78.127	2	9	21	13	297.5	GN17Urbana
DRIL78.128	1	7	12	24	207.5	GN17Urbana
DRIL78.128	2	11	34	74	407.5	GN17Urbana
DRIL78.129	1	5	1	13	605	GN17Urbana
DRIL78.129	2	11	33	49	462.5	GN17Urbana
DRIL78.130	1	5	5	66	415	GN17Urbana
DRIL78.130	2	9	20	4	NA	GN17Urbana
DRIL78.131	1	7	14	66	317.5	GN17Urbana
DRIL78.131	2	10	27	48	252.5	GN17Urbana
DRIL78.132	1	8	18	27	397.5	GN17Urbana
DRIL78.132	2	12	35	70	170	GN17Urbana
DRIL78.133	1	6	10	11	352.5	GN17Urbana
DRIL78.133	2	11	31	25	442.5	GN17Urbana
DRIL78.134	1	7	13	42	155	GN17Urbana
DRIL78.134	2	11	30	13	352.5	GN17Urbana
DRIL78.135	1	7	13	48	290	GN17Urbana
DRIL78.135	2	8	20	4	NA	GN17Urbana
DRIL78.136	1	6	7	46	515	GN17Urbana
DRIL78.136	2	9	23	47	470	GN17Urbana
DRIL78.137	1	5	3	35	487.5	GN17Urbana
DRIL78.137	2	11	30	8	632.5	GN17Urbana
DRIL78.138	1	7	12	25	352.5	GN17Urbana
DRIL78.138	2	9	20	8	515	GN17Urbana
DRIL78.139	1	5	3	46	460	GN17Urbana
DRIL78.139	2	12	35	72	370	GN17Urbana
DRIL78.140	1	7	15	73	335	GN17Urbana
DRIL78.140	2	9	24	58	452.5	GN17Urbana
DRIL78.141	1	7	14	59	352.5	GN17Urbana
DRIL78.141	2	10	29	8	307.5	GN17Urbana
DRIL78.142	1	7	13	40	352.5	GN17Urbana
DRIL78.142	2	9	22	33	642.5	GN17Urbana
DRIL78.143	1	8	16	58	542.5	GN17Urbana
DRIL78.143	2	11	31	24	715	GN17Urbana
DRIL78.144	1	8	18	36	880	GN17Urbana
DRIL78.144	2	11	30	6	877.5	GN17Urbana
DRIL78.145	1	7	14	60	380	GN17Urbana
DRIL78.145	2	10	26	53	280	GN17Urbana
DRIL78.147	1	6	10	4	NA	GN17Urbana
DRIL78.147	2	10	25	73	245	GN17Urbana
DRIL78.148	1	5	1	8	197.5	GN17Urbana
DRIL78.148	2	10	26	55	72.5	GN17Urbana
DRIL78.149	1	5	2	24	642.5	GN17Urbana
DRIL78.149	2	11	34	66	570	GN17Urbana
DRIL78.150	1	5	1	9	577.5	GN17Urbana
DRIL78.150	2	11	31	26	632.5	GN17Urbana
DRIL78.151	1	5	5	68	280	GN17Urbana
DRIL78.151	2	11	32	44	487.5	GN17Urbana
DRIL78.152	1	8	17	48	415	GN17Urbana
DRIL78.152	2	10	28	28	180	GN17Urbana
DRIL78.159	1	7	12	34	417.5	GN17Urbana
DRIL78.159	2	10	27	41	380	GN17Urbana
DRIL78.161	1	6	9	25	397.5	GN17Urbana
DRIL78.161	2	10	27	49	280	GN17Urbana
DRIL78.162	1	6	10	10	497.5	GN17Urbana
DRIL78.162	2	11	33	50	362.5	GN17Urbana
DRIL78.164	1	6	7	49	297.5	GN17Urbana
DRIL78.164	2	11	34	71	252.5	GN17Urbana
DRIL78.165	1	5	1	5	450	GN17Urbana
DRIL78.165	2	10	29	19	380	GN17Urbana
DRIL78.166	1	6	7	54	335	GN17Urbana
DRIL78.166	2	9	24	59	425	GN17Urbana
DRIL78.167	1	7	12	35	425	GN17Urbana
DRIL78.167	2	11	31	29	515	GN17Urbana
DRIL78.168	1	7	15	72	162.5	GN17Urbana
DRIL78.168	2	9	23	53	635	GN17Urbana
DRIL78.169	1	6	6	72	390	GN17Urbana
DRIL78.169	2	11	33	52	407.5	GN17Urbana
DRIL78.170	1	5	1	17	280	GN17Urbana
DRIL78.170	2	11	34	69	207.5	GN17Urbana
DRIL78.171	1	8	17	53	632.5	GN17Urbana
DRIL78.171	2	11	33	56	487.5	GN17Urbana
DRIL78.172	1	6	8	37	550	GN17Urbana
DRIL78.172	2	10	27	40	470	GN17Urbana
DRIL78.173	1	8	17	43	532.5	GN17Urbana
DRIL78.173	2	11	30	10	532.5	GN17Urbana
DRIL78.175	1	8	18	37	207.5	GN17Urbana
DRIL78.175	2	12	36	53	152.5	GN17Urbana
DRIL78.176	1	8	15	74	252.5	GN17Urbana
DRIL78.176	2	11	31	22	387.5	GN17Urbana
DRIL78.177	1	7	13	50	190	GN17Urbana
DRIL78.177	2	12	35	75	352.5	GN17Urbana
DRIL78.178	1	5	2	27	435	GN17Urbana
DRIL78.178	2	8	19	17	380	GN17Urbana
DRIL78.179	1	7	12	31	397.5	GN17Urbana
DRIL78.179	2	8	19	19	407.5	GN17Urbana
DRIL78.180	1	6	9	20	460	GN17Urbana
DRIL78.180	2	9	24	60	325	GN17Urbana
DRIL78.182	1	7	12	26	380	GN17Urbana
DRIL78.182	2	12	35	64	560	GN17Urbana
DRIL78.183	1	6	10	12	325	GN17Urbana
DRIL78.183	2	9	24	64	217.5	GN17Urbana
DRIL78.184	1	8	18	31	307.5	GN17Urbana
DRIL78.184	2	10	28	30	335	GN17Urbana
DRIL78.185	1	5	4	61	425	GN17Urbana
DRIL78.185	2	9	21	15	507.5	GN17Urbana
DRIL78.186	1	6	6	64	NA	GN17Urbana
DRIL78.186	2	9	21	17	NA	GN17Urbana
DRIL78.187	1	7	12	30	435	GN17Urbana
DRIL78.187	2	11	33	57	660	GN17Urbana
DRIL78.188	1	7	11	20	262.5	GN17Urbana
DRIL78.188	2	9	24	62	570	GN17Urbana
DRIL78.189	1	6	8	43	262.5	GN17Urbana
DRIL78.189	2	10	29	10	145	GN17Urbana
DRIL78.190	1	7	11	18	190	GN17Urbana
DRIL78.190	2	9	20	6	397.5	GN17Urbana
DRIL78.191	1	8	17	42	825	GN17Urbana
DRIL78.191	2	10	26	56	280	GN17Urbana
DRIL78.192	1	5	5	71	245	GN17Urbana
DRIL78.192	2	9	23	55	442.5	GN17Urbana
DRIL78.194	1	7	15	75	245	GN17Urbana
DRIL78.194	2	8	19	14	415	GN17Urbana
DRIL78.195	1	6	9	18	487.5	GN17Urbana
DRIL78.195	2	9	23	46	435	GN17Urbana
DRIL78.196	1	8	16	69	497.5	GN17Urbana
DRIL78.196	2	10	26	62	117.5	GN17Urbana
DRIL78.197	1	6	8	35	297.5	GN17Urbana
DRIL78.197	2	9	20	7	370	GN17Urbana
DRIL78.198	1	7	15	69	335	GN17Urbana
DRIL78.198	2	10	29	14	307.5	GN17Urbana
DRIL78.199	1	7	13	41	217.5	GN17Urbana
DRIL78.199	2	10	25	72	352.5	GN17Urbana
DRIL78.200	1	5	2	29	470	GN17Urbana
DRIL78.200	2	9	24	69	262.5	GN17Urbana
DRIL78.201	1	7	11	21	117.5	GN17Urbana
DRIL78.201	2	9	23	54	252.5	GN17Urbana
DRIL78.202	1	5	2	26	162.5	GN17Urbana
DRIL78.202	2	9	22	34	117.5	GN17Urbana
DRIL78.203	1	5	2	21	817.5	GN17Urbana
DRIL78.203	2	9	23	49	417.5	GN17Urbana
DRIL78.204	1	8	17	47	387.5	GN17Urbana
DRIL78.204	2	9	24	67	325	GN17Urbana
DRIL78.205	1	5	4	59	360	GN17Urbana
DRIL78.205	2	11	30	12	415	GN17Urbana
DRIL78.207	1	7	13	46	380	GN17Urbana
DRIL78.207	2	10	29	15	407.5	GN17Urbana
DRIL78.208	1	6	8	33	477.5	GN17Urbana
DRIL78.208	2	12	35	74	387.5	GN17Urbana
DRIL78.210	1	7	12	28	145	GN17Urbana
DRIL78.210	2	10	29	17	152.5	GN17Urbana
DRIL78.211	1	8	18	38	660	GN17Urbana
DRIL78.211	2	9	25	74	525	GN17Urbana
DRIL78.212	1	7	13	45	117.5	GN17Urbana
DRIL78.212	2	10	27	45	117.5	GN17Urbana
DRIL78.213	1	8	18	33	1115	GN17Urbana
DRIL78.213	2	8	19	15	1115	GN17Urbana
DRIL78.214	1	6	10	6	660	GN17Urbana
DRIL78.214	2	12	36	61	862.5	GN17Urbana
DRIL78.215	1	7	12	32	370	GN17Urbana
DRIL78.215	2	10	28	26	345	GN17Urbana
DRIL78.216	1	5	5	67	270	GN17Urbana
DRIL78.216	2	11	31	23	415	GN17Urbana
DRIL78.217	1	6	7	55	245	GN17Urbana
DRIL78.217	2	8	20	5	152.5	GN17Urbana
DRIL78.218	1	6	10	7	325	GN17Urbana
DRIL78.218	2	10	29	18	325	GN17Urbana
DRIL78.219	1	8	18	34	515	GN17Urbana
DRIL78.219	2	11	33	53	470	GN17Urbana
DRIL78.220	1	6	6	61	200	GN17Urbana
DRIL78.220	2	10	29	20	90	GN17Urbana
DRIL78.221	1	5	4	55	570	GN17Urbana
DRIL78.221	2	10	26	57	307.5	GN17Urbana
DRIL78.222	1	5	1	14	1022.5	GN17Urbana
DRIL78.222	2	11	30	4	NA	GN17Urbana
DRIL78.223	1	5	1	7	180	GN17Urbana
DRIL78.223	2	10	28	25	327.5	GN17Urbana
DRIL78.224	1	5	4	60	370	GN17Urbana
DRIL78.224	2	11	31	27	642.5	GN17Urbana
DRIL78.228	1	7	14	55	90	GN17Urbana
DRIL78.228	2	8	20	6	280	GN17Urbana
DRIL78.229	1	7	11	19	207.5	GN17Urbana
DRIL78.229	2	9	21	23	180	GN17Urbana
DRIL78.230	1	6	10	13	325	GN17Urbana
DRIL78.230	2	9	22	35	235	GN17Urbana
DRIL78.231	1	7	13	39	235	GN17Urbana
DRIL78.231	2	10	28	24	280	GN17Urbana
DRIL78.232	1	5	2	23	452.5	GN17Urbana
DRIL78.232	2	9	20	10	352.5	GN17Urbana
DRIL78.233	1	5	3	37	280	GN17Urbana
DRIL78.233	2	9	23	48	252.5	GN17Urbana
DRIL78.234	1	8	17	44	442.5	GN17Urbana
DRIL78.234	2	10	29	16	307.5	GN17Urbana
DRIL78.235	1	8	18	30	387.5	GN17Urbana
DRIL78.235	2	9	22	39	225	GN17Urbana
DRIL78.236	1	5	2	30	445	GN17Urbana
DRIL78.236	2	9	21	24	217.5	GN17Urbana
DRIL78.237	1	6	7	53	552.5	GN17Urbana
DRIL78.237	2	8	19	20	770	GN17Urbana
DRIL78.238	1	8	15	73	780	GN17Urbana
DRIL78.238	2	10	30	5	597.5	GN17Urbana
DRIL78.239	1	6	6	66	217.5	GN17Urbana
DRIL78.239	2	10	25	70	117.5	GN17Urbana
DRIL78.240	1	6	10	9	245	GN17Urbana
DRIL78.240	2	9	20	9	317.5	GN17Urbana
DRIL78.241	1	5	5	75	145	GN17Urbana
DRIL78.241	2	10	25	68	72.5	GN17Urbana
DRIL78.243	1	6	8	39	1060	GN17Urbana
DRIL78.243	2	9	23	44	1115	GN17Urbana
DRIL78.245	1	6	6	68	317.5	GN17Urbana
DRIL78.245	2	11	30	9	560	GN17Urbana
DRIL78.246	1	6	6	62	182.5	GN17Urbana
DRIL78.246	2	12	36	57	470	GN17Urbana
DRIL78.247	1	7	11	12	NA	GN17Urbana
DRIL78.247	2	10	28	34	NA	GN17Urbana
DRIL78.248	1	8	17	50	615	GN17Urbana
DRIL78.248	2	10	27	38	525	GN17Urbana
DRIL78.249	1	6	7	47	155	GN17Urbana
DRIL78.249	2	10	27	46	117.5	GN17Urbana
DRIL78.250	1	5	1	10	325	GN17Urbana
DRIL78.250	2	11	32	33	515	GN17Urbana
DRIL78.251	1	7	15	71	135	GN17Urbana
DRIL78.251	2	11	32	34	425	GN17Urbana
DRIL78.252	1	6	9	22	352.5	GN17Urbana
DRIL78.252	2	8	20	9	315	GN17Urbana
DRIL78.253	1	6	7	58	362.5	GN17Urbana
DRIL78.253	2	10	28	35	307.5	GN17Urbana
DRIL78.254	1	7	14	62	NA	GN17Urbana
DRIL78.254	2	9	22	37	NA	GN17Urbana
DRIL78.255	1	5	4	50	307.5	GN17Urbana
DRIL78.255	2	11	33	47	477.5	GN17Urbana
DRIL78.257	1	6	8	34	297.5	GN17Urbana
DRIL78.257	2	9	24	63	190	GN17Urbana
DRIL78.258	1	5	4	51	387.5	GN17Urbana
DRIL78.258	2	9	23	52	352.5	GN17Urbana
DRIL78.260	1	6	8	31	452.5	GN17Urbana
DRIL78.260	2	9	25	76	225	GN17Urbana
M141A B1 Pl1 AOC	1	5	4	52	NA	GN17Urbana
M141A B1 Pl1 AOC	2	8	20	7	NA	GN17Urbana
NC258	1	5	1	19	145	GN17Urbana
NC258	2	8	19	10	127.5	GN17Urbana
NC258	2	9	20	12	190	GN17Urbana
NC258	2	9	21	27	117.5	GN17Urbana
NC258	2	9	22	42	135	GN17Urbana
NC258	2	9	23	57	117.5	GN17Urbana
NC258	2	9	24	72	72.5	GN17Urbana
NC258	2	10	25	66	72.5	GN17Urbana
NC258	2	10	26	51	100	GN17Urbana
NC258	2	10	27	36	90	GN17Urbana
NC258	2	10	28	21	45	GN17Urbana
NC258	2	10	29	6	100	GN17Urbana
NC258	2	11	30	16	342.5	GN17Urbana
NC258	2	11	31	31	397.5	GN17Urbana
NC258	2	11	32	46	297.5	GN17Urbana
NC258	2	11	33	61	135	GN17Urbana
NC258	2	11	34	76	290	GN17Urbana
NC344	1	5	2	34	45	GN17Urbana
NC344	1	5	3	49	72.5	GN17Urbana
NC344	1	5	4	64	107.5	GN17Urbana
NC344	1	6	5	74	117.5	GN17Urbana
NC344	1	6	6	59	45	GN17Urbana
NC344	1	6	7	44	425	GN17Urbana
NC344	1	6	8	29	72.5	GN17Urbana
NC344	1	6	9	14	72.5	GN17Urbana
NC344	1	7	10	8	NA	GN17Urbana
NC344	1	7	11	23	NA	GN17Urbana
NC344	1	7	12	38	45	GN17Urbana
NC344	1	7	13	53	NA	GN17Urbana
NC344	1	7	14	68	45	GN17Urbana
NC344	1	8	15	70	127.5	GN17Urbana
NC344	1	8	16	55	100	GN17Urbana
NC344	1	8	17	40	80	GN17Urbana
NC344	1	8	18	25	72.5	GN17Urbana
NC344	2	12	35	62	335	GN17Urbana
NC344	2	12	36	47	72.5	GN17Urbana
Oh7B	1	5	1	18	442.5	GN17Urbana
Oh7B	1	5	2	33	560	GN17Urbana
Oh7B	1	5	3	48	497.5	GN17Urbana
Oh7B	1	5	4	63	470	GN17Urbana
Oh7B	1	6	5	75	345	GN17Urbana
Oh7B	1	6	6	60	335	GN17Urbana
Oh7B	1	6	7	45	515	GN17Urbana
Oh7B	1	6	8	30	515	GN17Urbana
Oh7B	1	6	9	15	442.5	GN17Urbana
Oh7B	1	7	10	7	262.5	GN17Urbana
Oh7B	1	7	11	22	487.5	GN17Urbana
Oh7B	1	7	12	37	415	GN17Urbana
Oh7B	1	7	13	52	280	GN17Urbana
Oh7B	1	7	14	67	290	GN17Urbana
Oh7B	1	8	15	71	480	GN17Urbana
Oh7B	1	8	16	56	532.5	GN17Urbana
Oh7B	1	8	17	41	397.5	GN17Urbana
Oh7B	1	8	18	26	470	GN17Urbana
Oh7B	2	8	19	11	487.5	GN17Urbana
Oh7B	2	9	20	11	460	GN17Urbana
Oh7B	2	9	21	26	425	GN17Urbana
Oh7B	2	9	22	41	425	GN17Urbana
Oh7B	2	9	23	56	442.5	GN17Urbana
Oh7B	2	9	24	71	460	GN17Urbana
Oh7B	2	10	25	67	100	GN17Urbana
Oh7B	2	10	26	52	397.5	GN17Urbana
Oh7B	2	10	27	37	407.5	GN17Urbana
Oh7B	2	10	28	22	397.5	GN17Urbana
Oh7B	2	10	29	7	352.5	GN17Urbana
Oh7B	2	11	30	15	660	GN17Urbana
Oh7B	2	11	31	30	532.5	GN17Urbana
Oh7B	2	11	32	45	560	GN17Urbana
Oh7B	2	11	33	60	487.5	GN17Urbana
Oh7B	2	11	34	75	515	GN17Urbana
Oh7B	2	12	35	63	497.5	GN17Urbana
Oh7B	2	12	36	48	487.5	GN17Urbana

## Sheet: GN2017Monmouth
Name	Rep	Range	Block	Row	AUDPC	Location
A632	1	3	4	4	790	GN17Monmouth
A632	2	3	20	20	595	GN17Monmouth
DRIL78.001	1	11	10	10	730	GN17Monmouth
DRIL78.001	2	6	26	26	665	GN17Monmouth
DRIL78.002	1	8	5	5	835	GN17Monmouth
DRIL78.002	2	6	34	34	575	GN17Monmouth
DRIL78.003	1	5	3	3	545	GN17Monmouth
DRIL78.003	2	8	29	29	410	GN17Monmouth
DRIL78.004	1	5	9	9	665	GN17Monmouth
DRIL78.004	2	1	35	35	600	GN17Monmouth
DRIL78.005	1	12	18	18	365	GN17Monmouth
DRIL78.005	2	12	32	32	275	GN17Monmouth
DRIL78.006	1	1	9	9	715	GN17Monmouth
DRIL78.006	2	9	28	28	790	GN17Monmouth
DRIL78.007	1	11	16	16	575	GN17Monmouth
DRIL78.007	2	7	19	19	580	GN17Monmouth
DRIL78.008	1	5	18	18	665	GN17Monmouth
DRIL78.008	2	7	26	26	785	GN17Monmouth
DRIL78.009	1	6	3	3	615	GN17Monmouth
DRIL78.009	2	12	19	19	490	GN17Monmouth
DRIL78.010	1	7	1	1	430	GN17Monmouth
DRIL78.010	2	11	22	22	650	GN17Monmouth
DRIL78.011	1	5	11	11	765	GN17Monmouth
DRIL78.011	2	4	34	34	545	GN17Monmouth
DRIL78.012	1	9	4	4	1020	GN17Monmouth
DRIL78.012	2	9	24	24	1000	GN17Monmouth
DRIL78.013	1	13	5	5	920	GN17Monmouth
DRIL78.013	2	4	22	22	810	GN17Monmouth
DRIL78.014	1	5	5	5	595	GN17Monmouth
DRIL78.014	2	3	19	19	505	GN17Monmouth
DRIL78.015	1	3	16	16	785	GN17Monmouth
DRIL78.015	2	13	24	24	NA	GN17Monmouth
DRIL78.016	1	6	15	15	NA	GN17Monmouth
DRIL78.016	2	12	34	34	NA	GN17Monmouth
DRIL78.017	1	4	12	12	805	GN17Monmouth
DRIL78.017	2	4	24	24	740	GN17Monmouth
DRIL78.018	1	9	15	15	810	GN17Monmouth
DRIL78.018	2	3	22	22	950	GN17Monmouth
DRIL78.019	1	13	13	13	600	GN17Monmouth
DRIL78.019	2	13	33	33	550	GN17Monmouth
DRIL78.020	1	2	16	16	960	GN17Monmouth
DRIL78.020	2	1	34	34	455	GN17Monmouth
DRIL78.021	1	4	3	3	590	GN17Monmouth
DRIL78.021	2	12	26	26	810	GN17Monmouth
DRIL78.022	1	13	9	9	595	GN17Monmouth
DRIL78.022	2	4	21	21	565	GN17Monmouth
DRIL78.023	1	6	16	16	615	GN17Monmouth
DRIL78.023	2	11	32	32	460	GN17Monmouth
DRIL78.024	1	10	12	12	845	GN17Monmouth
DRIL78.024	2	8	23	23	645	GN17Monmouth
DRIL78.025	1	6	8	8	785	GN17Monmouth
DRIL78.025	2	4	30	30	490	GN17Monmouth
DRIL78.026	1	4	17	17	875	GN17Monmouth
DRIL78.026	2	2	21	21	615	GN17Monmouth
DRIL78.027	1	1	18	18	790	GN17Monmouth
DRIL78.027	2	10	21	21	570	GN17Monmouth
DRIL78.028	1	13	10	10	815	GN17Monmouth
DRIL78.028	2	3	23	23	740	GN17Monmouth
DRIL78.029	1	8	18	18	480	GN17Monmouth
DRIL78.029	2	10	29	29	370	GN17Monmouth
DRIL78.030	1	3	17	17	610	GN17Monmouth
DRIL78.030	2	9	19	19	605	GN17Monmouth
DRIL78.031	1	7	11	11	550	GN17Monmouth
DRIL78.031	2	2	19	19	750	GN17Monmouth
DRIL78.032	1	3	9	9	570	GN17Monmouth
DRIL78.032	2	2	30	30	550	GN17Monmouth
DRIL78.033	1	9	5	5	615	GN17Monmouth
DRIL78.033	2	7	27	27	460	GN17Monmouth
DRIL78.034	1	4	4	4	765	GN17Monmouth
DRIL78.034	2	8	27	27	1000	GN17Monmouth
DRIL78.035	1	6	10	10	665	GN17Monmouth
DRIL78.035	2	7	34	34	650	GN17Monmouth
DRIL78.036	1	9	2	2	745	GN17Monmouth
DRIL78.036	2	12	31	31	415	GN17Monmouth
DRIL78.037	1	2	9	9	525	GN17Monmouth
DRIL78.037	2	2	22	22	615	GN17Monmouth
DRIL78.038	1	12	1	1	NA	GN17Monmouth
DRIL78.038	2	9	35	35	NA	GN17Monmouth
DRIL78.039	1	1	14	14	930	GN17Monmouth
DRIL78.039	2	7	28	28	690	GN17Monmouth
DRIL78.040	1	2	1	1	670	GN17Monmouth
DRIL78.040	2	1	25	25	930	GN17Monmouth
DRIL78.041	1	1	6	6	790	GN17Monmouth
DRIL78.041	2	1	27	27	1000	GN17Monmouth
DRIL78.043	1	9	10	10	730	GN17Monmouth
DRIL78.043	2	10	32	32	575	GN17Monmouth
DRIL78.044	1	9	3	3	570	GN17Monmouth
DRIL78.044	2	12	36	36	435	GN17Monmouth
DRIL78.045	1	1	17	17	NA	GN17Monmouth
DRIL78.045	2	8	20	20	NA	GN17Monmouth
DRIL78.046	1	2	15	15	765	GN17Monmouth
DRIL78.046	2	7	36	36	550	GN17Monmouth
DRIL78.047	1	10	16	16	615	GN17Monmouth
DRIL78.047	2	12	25	25	600	GN17Monmouth
DRIL78.048	1	6	9	9	570	GN17Monmouth
DRIL78.048	2	3	31	31	575	GN17Monmouth
DRIL78.049	1	8	14	14	1085	GN17Monmouth
DRIL78.049	2	12	33	33	570	GN17Monmouth
DRIL78.050	1	12	2	2	705	GN17Monmouth
DRIL78.050	2	13	28	28	575	GN17Monmouth
DRIL78.051	1	11	13	13	345	GN17Monmouth
DRIL78.051	2	1	32	32	255	GN17Monmouth
DRIL78.052	1	3	7	7	945	GN17Monmouth
DRIL78.052	2	1	22	22	950	GN17Monmouth
DRIL78.053	1	10	14	14	950	GN17Monmouth
DRIL78.053	2	6	32	32	645	GN17Monmouth
DRIL78.054	1	4	16	16	955	GN17Monmouth
DRIL78.054	2	6	21	21	640	GN17Monmouth
DRIL78.055	1	1	2	2	565	GN17Monmouth
DRIL78.055	2	12	35	35	430	GN17Monmouth
DRIL78.056	1	10	3	3	NA	GN17Monmouth
DRIL78.056	2	5	25	25	NA	GN17Monmouth
DRIL78.057	1	9	7	7	790	GN17Monmouth
DRIL78.057	2	2	31	31	920	GN17Monmouth
DRIL78.058	1	3	8	8	735	GN17Monmouth
DRIL78.058	2	7	21	21	545	GN17Monmouth
DRIL78.059	1	13	12	12	1045	GN17Monmouth
DRIL78.059	2	10	30	30	785	GN17Monmouth
DRIL78.060	1	6	2	2	1110	GN17Monmouth
DRIL78.060	2	4	36	36	900	GN17Monmouth
DRIL78.061	1	5	6	6	970	GN17Monmouth
DRIL78.061	2	5	32	32	975	GN17Monmouth
DRIL78.063	1	8	4	4	595	GN17Monmouth
DRIL78.063	2	5	28	28	570	GN17Monmouth
DRIL78.064	1	2	3	3	410	GN17Monmouth
DRIL78.064	2	9	22	22	740	GN17Monmouth
DRIL78.065	1	5	13	13	720	GN17Monmouth
DRIL78.065	2	13	21	21	NA	GN17Monmouth
DRIL78.066	1	13	15	15	575	GN17Monmouth
DRIL78.066	2	3	25	25	460	GN17Monmouth
DRIL78.067	1	10	9	9	645	GN17Monmouth
DRIL78.067	2	11	34	34	810	GN17Monmouth
DRIL78.068	1	1	5	5	710	GN17Monmouth
DRIL78.068	2	3	26	26	710	GN17Monmouth
DRIL78.069	1	8	11	11	595	GN17Monmouth
DRIL78.069	2	8	35	35	865	GN17Monmouth
DRIL78.070	1	13	2	2	1010	GN17Monmouth
DRIL78.070	2	4	27	27	835	GN17Monmouth
DRIL78.071	1	9	17	17	860	GN17Monmouth
DRIL78.071	2	4	31	31	720	GN17Monmouth
DRIL78.072	1	4	6	6	735	GN17Monmouth
DRIL78.072	2	9	34	34	600	GN17Monmouth
DRIL78.073	1	3	14	14	790	GN17Monmouth
DRIL78.073	2	8	21	21	520	GN17Monmouth
DRIL78.074	1	2	7	7	805	GN17Monmouth
DRIL78.074	2	4	32	32	570	GN17Monmouth
DRIL78.075	1	7	16	16	NA	GN17Monmouth
DRIL78.075	2	5	22	22	NA	GN17Monmouth
DRIL78.076	1	5	16	16	1005	GN17Monmouth
DRIL78.076	2	9	27	27	NA	GN17Monmouth
DRIL78.077	1	8	8	8	770	GN17Monmouth
DRIL78.077	2	8	32	32	NA	GN17Monmouth
DRIL78.078	1	2	11	11	505	GN17Monmouth
DRIL78.078	2	2	36	36	575	GN17Monmouth
DRIL78.079	1	12	9	9	530	GN17Monmouth
DRIL78.079	2	13	36	36	435	GN17Monmouth
DRIL78.080	1	6	17	17	880	GN17Monmouth
DRIL78.080	2	6	35	35	890	GN17Monmouth
DRIL78.082	1	6	12	12	930	GN17Monmouth
DRIL78.082	2	9	21	21	525	GN17Monmouth
DRIL78.083	1	4	14	14	880	GN17Monmouth
DRIL78.083	2	11	35	35	NA	GN17Monmouth
DRIL78.084	1	3	6	6	1000	GN17Monmouth
DRIL78.084	2	4	28	28	665	GN17Monmouth
DRIL78.085	1	12	10	10	615	GN17Monmouth
DRIL78.085	2	4	19	19	435	GN17Monmouth
DRIL78.086	1	6	13	13	765	GN17Monmouth
DRIL78.086	2	11	24	24	835	GN17Monmouth
DRIL78.087	1	5	14	14	805	GN17Monmouth
DRIL78.087	2	13	30	30	615	GN17Monmouth
DRIL78.089	1	13	4	4	365	GN17Monmouth
DRIL78.089	2	12	29	29	305	GN17Monmouth
DRIL78.091	1	7	6	6	925	GN17Monmouth
DRIL78.091	2	4	35	35	1005	GN17Monmouth
DRIL78.092	1	12	14	14	1155	GN17Monmouth
DRIL78.092	2	11	36	36	840	GN17Monmouth
DRIL78.093	1	13	3	3	615	GN17Monmouth
DRIL78.093	2	2	34	34	550	GN17Monmouth
DRIL78.094	1	11	18	18	505	GN17Monmouth
DRIL78.094	2	3	34	34	455	GN17Monmouth
DRIL78.095	1	4	8	8	1160	GN17Monmouth
DRIL78.095	2	3	28	28	645	GN17Monmouth
DRIL78.096	1	9	6	6	665	GN17Monmouth
DRIL78.096	2	13	22	22	NA	GN17Monmouth
DRIL78.097	1	7	7	7	805	GN17Monmouth
DRIL78.097	2	6	25	25	695	GN17Monmouth
DRIL78.098	1	6	5	5	970	GN17Monmouth
DRIL78.098	2	8	36	36	720	GN17Monmouth
DRIL78.099	1	3	2	2	235	GN17Monmouth
DRIL78.099	2	7	25	25	170	GN17Monmouth
DRIL78.100	1	9	16	16	555	GN17Monmouth
DRIL78.100	2	9	23	23	630	GN17Monmouth
DRIL78.101	1	6	11	11	860	GN17Monmouth
DRIL78.101	2	6	30	30	575	GN17Monmouth
DRIL78.102	1	8	15	15	740	GN17Monmouth
DRIL78.102	2	2	26	26	855	GN17Monmouth
DRIL78.103	1	8	16	16	760	GN17Monmouth
DRIL78.103	2	10	36	36	435	GN17Monmouth
DRIL78.104	1	13	16	16	620	GN17Monmouth
DRIL78.104	2	2	20	20	620	GN17Monmouth
DRIL78.105	1	9	13	13	505	GN17Monmouth
DRIL78.105	2	1	26	26	550	GN17Monmouth
DRIL78.106	1	11	1	1	360	GN17Monmouth
DRIL78.106	2	13	19	19	320	GN17Monmouth
DRIL78.107	1	11	7	7	755	GN17Monmouth
DRIL78.107	2	3	36	36	535	GN17Monmouth
DRIL78.108	1	11	14	14	1115	GN17Monmouth
DRIL78.108	2	10	25	25	620	GN17Monmouth
DRIL78.109	1	8	9	9	690	GN17Monmouth
DRIL78.109	2	1	19	19	505	GN17Monmouth
DRIL78.110	1	7	3	3	640	GN17Monmouth
DRIL78.110	2	1	31	31	1000	GN17Monmouth
DRIL78.111	1	1	11	11	595	GN17Monmouth
DRIL78.111	2	5	31	31	460	GN17Monmouth
DRIL78.112	1	8	1	1	835	GN17Monmouth
DRIL78.112	2	6	36	36	695	GN17Monmouth
DRIL78.113	1	10	15	15	595	GN17Monmouth
DRIL78.113	2	2	33	33	625	GN17Monmouth
DRIL78.114	1	5	4	4	1090	GN17Monmouth
DRIL78.114	2	10	35	35	975	GN17Monmouth
DRIL78.116	1	2	8	8	840	GN17Monmouth
DRIL78.116	2	8	26	26	620	GN17Monmouth
DRIL78.117	1	11	3	3	660	GN17Monmouth
DRIL78.117	2	8	33	33	670	GN17Monmouth
DRIL78.118	1	8	3	3	615	GN17Monmouth
DRIL78.118	2	9	32	32	790	GN17Monmouth
DRIL78.121	1	9	11	11	575	GN17Monmouth
DRIL78.121	2	9	33	33	665	GN17Monmouth
DRIL78.122	1	10	5	5	735	GN17Monmouth
DRIL78.122	2	9	29	29	435	GN17Monmouth
DRIL78.123	1	7	4	4	735	GN17Monmouth
DRIL78.123	2	7	32	32	760	GN17Monmouth
DRIL78.124	1	3	11	11	960	GN17Monmouth
DRIL78.124	2	12	27	27	725	GN17Monmouth
DRIL78.125	1	12	8	8	NA	GN17Monmouth
DRIL78.125	2	5	33	33	NA	GN17Monmouth
DRIL78.127	1	8	7	7	835	GN17Monmouth
DRIL78.127	2	1	21	21	545	GN17Monmouth
DRIL78.128	1	1	12	12	475	GN17Monmouth
DRIL78.128	2	13	34	34	740	GN17Monmouth
DRIL78.129	1	9	1	1	690	GN17Monmouth
DRIL78.129	2	3	33	33	530	GN17Monmouth
DRIL78.130	1	2	5	5	635	GN17Monmouth
DRIL78.130	2	7	20	20	790	GN17Monmouth
DRIL78.131	1	13	14	14	925	GN17Monmouth
DRIL78.131	2	3	27	27	745	GN17Monmouth
DRIL78.132	1	13	18	18	410	GN17Monmouth
DRIL78.132	2	7	35	35	475	GN17Monmouth
DRIL78.133	1	3	10	10	430	GN17Monmouth
DRIL78.133	2	9	31	31	455	GN17Monmouth
DRIL78.134	1	4	13	13	455	GN17Monmouth
DRIL78.134	2	12	30	30	525	GN17Monmouth
DRIL78.135	1	10	13	13	690	GN17Monmouth
DRIL78.135	2	6	20	20	805	GN17Monmouth
DRIL78.136	1	13	7	7	695	GN17Monmouth
DRIL78.136	2	5	23	23	785	GN17Monmouth
DRIL78.137	1	1	3	3	545	GN17Monmouth
DRIL78.137	2	7	30	30	525	GN17Monmouth
DRIL78.138	1	2	12	12	950	GN17Monmouth
DRIL78.138	2	11	20	20	650	GN17Monmouth
DRIL78.139	1	12	3	3	475	GN17Monmouth
DRIL78.139	2	5	35	35	440	GN17Monmouth
DRIL78.141	1	6	14	14	925	GN17Monmouth
DRIL78.141	2	13	29	29	415	GN17Monmouth
DRIL78.142	1	2	13	13	1045	GN17Monmouth
DRIL78.142	2	6	22	22	1005	GN17Monmouth
DRIL78.143	1	12	16	16	915	GN17Monmouth
DRIL78.143	2	8	31	31	585	GN17Monmouth
DRIL78.144	1	4	18	18	1025	GN17Monmouth
DRIL78.144	2	5	30	30	645	GN17Monmouth
DRIL78.145	1	7	14	14	995	GN17Monmouth
DRIL78.145	2	13	26	26	740	GN17Monmouth
DRIL78.147	1	10	10	10	800	GN17Monmouth
DRIL78.147	2	8	25	25	550	GN17Monmouth
DRIL78.148	1	4	1	1	525	GN17Monmouth
DRIL78.148	2	11	26	26	525	GN17Monmouth
DRIL78.149	1	5	2	2	745	GN17Monmouth
DRIL78.149	2	5	34	34	695	GN17Monmouth
DRIL78.150	1	5	1	1	575	GN17Monmouth
DRIL78.150	2	10	31	31	690	GN17Monmouth
DRIL78.151	1	4	5	5	780	GN17Monmouth
DRIL78.151	2	13	32	32	435	GN17Monmouth
DRIL78.152	1	7	17	17	550	GN17Monmouth
DRIL78.152	2	8	28	28	475	GN17Monmouth
DRIL78.159	1	11	12	12	635	GN17Monmouth
DRIL78.159	2	10	27	27	810	GN17Monmouth
DRIL78.161	1	4	9	9	620	GN17Monmouth
DRIL78.161	2	2	27	27	710	GN17Monmouth
DRIL78.162	1	4	10	10	860	GN17Monmouth
DRIL78.162	2	4	33	33	670	GN17Monmouth
DRIL78.164	1	10	7	7	595	GN17Monmouth
DRIL78.164	2	10	34	34	440	GN17Monmouth
DRIL78.165	1	1	1	1	520	GN17Monmouth
DRIL78.165	2	2	29	29	510	GN17Monmouth
DRIL78.166	1	5	7	7	615	GN17Monmouth
DRIL78.166	2	2	24	24	640	GN17Monmouth
DRIL78.167	1	12	12	12	610	GN17Monmouth
DRIL78.167	2	13	31	31	505	GN17Monmouth
DRIL78.168	1	4	15	15	790	GN17Monmouth
DRIL78.168	2	11	23	23	1025	GN17Monmouth
DRIL78.169	1	2	6	6	855	GN17Monmouth
DRIL78.169	2	6	33	33	620	GN17Monmouth
DRIL78.170	1	13	1	1	360	GN17Monmouth
DRIL78.170	2	8	34	34	320	GN17Monmouth
DRIL78.171	1	2	17	17	795	GN17Monmouth
DRIL78.171	2	10	33	33	660	GN17Monmouth
DRIL78.172	1	7	8	8	1010	GN17Monmouth
DRIL78.172	2	11	27	27	885	GN17Monmouth
DRIL78.173	1	12	17	17	790	GN17Monmouth
DRIL78.173	2	9	30	30	780	GN17Monmouth
DRIL78.175	1	3	18	18	340	GN17Monmouth
DRIL78.175	2	9	36	36	255	GN17Monmouth
DRIL78.176	1	11	15	15	480	GN17Monmouth
DRIL78.176	2	6	31	31	600	GN17Monmouth
DRIL78.177	1	12	13	13	575	GN17Monmouth
DRIL78.177	2	2	35	35	530	GN17Monmouth
DRIL78.178	1	8	2	2	770	GN17Monmouth
DRIL78.178	2	8	19	19	465	GN17Monmouth
DRIL78.179	1	8	12	12	655	GN17Monmouth
DRIL78.179	2	6	19	19	610	GN17Monmouth
DRIL78.180	1	9	9	9	525	GN17Monmouth
DRIL78.180	2	3	24	24	570	GN17Monmouth
DRIL78.182	1	3	12	12	940	GN17Monmouth
DRIL78.182	2	13	35	35	605	GN17Monmouth
DRIL78.183	1	2	10	10	610	GN17Monmouth
DRIL78.183	2	7	24	24	665	GN17Monmouth
DRIL78.184	1	9	18	18	690	GN17Monmouth
DRIL78.184	2	6	28	28	590	GN17Monmouth
DRIL78.185	1	12	4	4	1225	GN17Monmouth
DRIL78.185	2	3	21	21	595	GN17Monmouth
DRIL78.186	1	10	6	6	NA	GN17Monmouth
DRIL78.186	2	5	21	21	NA	GN17Monmouth
DRIL78.187	1	7	12	12	1065	GN17Monmouth
DRIL78.187	2	11	33	33	640	GN17Monmouth
DRIL78.188	1	12	11	11	865	GN17Monmouth
DRIL78.188	2	5	24	24	890	GN17Monmouth
DRIL78.189	1	1	8	8	720	GN17Monmouth
DRIL78.189	2	11	29	29	365	GN17Monmouth
DRIL78.190	1	10	11	11	535	GN17Monmouth
DRIL78.190	2	9	20	20	790	GN17Monmouth
DRIL78.191	1	13	17	17	645	GN17Monmouth
DRIL78.191	2	10	26	26	765	GN17Monmouth
DRIL78.192	1	7	5	5	905	GN17Monmouth
DRIL78.192	2	13	23	23	NA	GN17Monmouth
DRIL78.194	1	7	15	15	765	GN17Monmouth
DRIL78.194	2	11	19	19	485	GN17Monmouth
DRIL78.195	1	11	9	9	525	GN17Monmouth
DRIL78.195	2	4	23	23	600	GN17Monmouth
DRIL78.196	1	1	16	16	765	GN17Monmouth
DRIL78.196	2	4	26	26	525	GN17Monmouth
DRIL78.197	1	9	8	8	685	GN17Monmouth
DRIL78.197	2	10	20	20	1030	GN17Monmouth
DRIL78.198	1	1	15	15	925	GN17Monmouth
DRIL78.198	2	7	29	29	505	GN17Monmouth
DRIL78.199	1	3	13	13	685	GN17Monmouth
DRIL78.199	2	9	25	25	770	GN17Monmouth
DRIL78.200	1	10	2	2	NA	GN17Monmouth
DRIL78.200	2	12	24	24	670	GN17Monmouth
DRIL78.201	1	13	11	11	370	GN17Monmouth
DRIL78.201	2	12	23	23	425	GN17Monmouth
DRIL78.202	1	7	2	2	365	GN17Monmouth
DRIL78.202	2	7	22	22	385	GN17Monmouth
DRIL78.203	1	2	2	2	975	GN17Monmouth
DRIL78.203	2	7	23	23	1005	GN17Monmouth
DRIL78.204	1	8	17	17	670	GN17Monmouth
DRIL78.204	2	10	24	24	455	GN17Monmouth
DRIL78.205	1	10	4	4	480	GN17Monmouth
DRIL78.205	2	11	30	30	525	GN17Monmouth
DRIL78.207	1	8	13	13	1115	GN17Monmouth
DRIL78.207	2	6	29	29	435	GN17Monmouth
DRIL78.208	1	11	8	8	935	GN17Monmouth
DRIL78.208	2	3	35	35	NA	GN17Monmouth
DRIL78.210	1	5	12	12	500	GN17Monmouth
DRIL78.210	2	4	29	29	340	GN17Monmouth
DRIL78.211	1	2	18	18	365	GN17Monmouth
DRIL78.211	2	2	25	25	275	GN17Monmouth
DRIL78.212	1	7	13	13	365	GN17Monmouth
DRIL78.212	2	6	27	27	370	GN17Monmouth
DRIL78.213	1	7	18	18	1070	GN17Monmouth
DRIL78.213	2	10	19	19	985	GN17Monmouth
DRIL78.214	1	8	10	10	1070	GN17Monmouth
DRIL78.214	2	1	36	36	1050	GN17Monmouth
DRIL78.215	1	9	12	12	1135	GN17Monmouth
DRIL78.215	2	10	28	28	525	GN17Monmouth
DRIL78.216	1	3	5	5	480	GN17Monmouth
DRIL78.216	2	7	31	31	435	GN17Monmouth
DRIL78.217	1	4	7	7	520	GN17Monmouth
DRIL78.217	2	5	20	20	755	GN17Monmouth
DRIL78.218	1	7	10	10	950	GN17Monmouth
DRIL78.218	2	3	29	29	460	GN17Monmouth
DRIL78.219	1	6	18	18	740	GN17Monmouth
DRIL78.219	2	7	33	33	550	GN17Monmouth
DRIL78.220	1	13	6	6	810	GN17Monmouth
DRIL78.220	2	1	29	29	440	GN17Monmouth
DRIL78.221	1	6	4	4	840	GN17Monmouth
DRIL78.221	2	9	26	26	1005	GN17Monmouth
DRIL78.222	1	10	1	1	1175	GN17Monmouth
DRIL78.222	2	3	30	30	810	GN17Monmouth
DRIL78.223	1	3	1	1	455	GN17Monmouth
DRIL78.223	2	11	28	28	580	GN17Monmouth
DRIL78.224	1	11	4	4	715	GN17Monmouth
DRIL78.224	2	11	31	31	695	GN17Monmouth
DRIL78.228	1	2	14	14	760	GN17Monmouth
DRIL78.228	2	4	20	20	550	GN17Monmouth
DRIL78.229	1	11	11	11	435	GN17Monmouth
DRIL78.229	2	11	21	21	410	GN17Monmouth
DRIL78.230	1	1	10	10	680	GN17Monmouth
DRIL78.230	2	8	22	22	1020	GN17Monmouth
DRIL78.231	1	1	13	13	590	GN17Monmouth
DRIL78.231	2	12	28	28	505	GN17Monmouth
DRIL78.232	1	4	2	2	585	GN17Monmouth
DRIL78.232	2	13	20	20	650	GN17Monmouth
DRIL78.233	1	3	3	3	430	GN17Monmouth
DRIL78.233	2	6	23	23	620	GN17Monmouth
DRIL78.234	1	11	17	17	645	GN17Monmouth
DRIL78.234	2	5	29	29	480	GN17Monmouth
DRIL78.235	1	10	18	18	575	GN17Monmouth
DRIL78.235	2	12	22	22	615	GN17Monmouth
DRIL78.236	1	11	2	2	640	GN17Monmouth
DRIL78.236	2	12	21	21	600	GN17Monmouth
DRIL78.237	1	6	7	7	910	GN17Monmouth
DRIL78.237	2	5	19	19	515	GN17Monmouth
DRIL78.238	1	12	15	15	975	GN17Monmouth
DRIL78.238	2	1	30	30	695	GN17Monmouth
DRIL78.239	1	8	6	6	450	GN17Monmouth
DRIL78.239	2	11	25	25	440	GN17Monmouth
DRIL78.240	1	5	10	10	525	GN17Monmouth
DRIL78.240	2	12	20	20	385	GN17Monmouth
DRIL78.241	1	11	5	5	635	GN17Monmouth
DRIL78.241	2	13	25	25	410	GN17Monmouth
DRIL78.243	1	5	8	8	1330	GN17Monmouth
DRIL78.243	2	2	23	23	1315	GN17Monmouth
DRIL78.245	1	6	6	6	805	GN17Monmouth
DRIL78.245	2	8	30	30	550	GN17Monmouth
DRIL78.246	1	12	6	6	545	GN17Monmouth
DRIL78.246	2	5	36	36	455	GN17Monmouth
DRIL78.247	1	4	11	11	360	GN17Monmouth
DRIL78.247	2	2	28	28	NA	GN17Monmouth
DRIL78.248	1	5	17	17	1045	GN17Monmouth
DRIL78.248	2	13	27	27	785	GN17Monmouth
DRIL78.249	1	12	7	7	480	GN17Monmouth
DRIL78.249	2	5	27	27	720	GN17Monmouth
DRIL78.250	1	6	1	1	930	GN17Monmouth
DRIL78.250	2	2	32	32	935	GN17Monmouth
DRIL78.251	1	3	15	15	625	GN17Monmouth
DRIL78.251	2	3	32	32	550	GN17Monmouth
DRIL78.252	1	7	9	9	475	GN17Monmouth
DRIL78.252	2	1	20	20	710	GN17Monmouth
DRIL78.253	1	1	7	7	655	GN17Monmouth
DRIL78.253	2	1	28	28	575	GN17Monmouth
DRIL78.254	1	9	14	14	NA	GN17Monmouth
DRIL78.254	2	10	22	22	NA	GN17Monmouth
DRIL78.255	1	1	4	4	530	GN17Monmouth
DRIL78.255	2	1	33	33	440	GN17Monmouth
DRIL78.257	1	10	8	8	470	GN17Monmouth
DRIL78.257	2	6	24	24	450	GN17Monmouth
DRIL78.258	1	2	4	4	785	GN17Monmouth
DRIL78.258	2	10	23	23	910	GN17Monmouth
DRIL78.260	1	13	8	8	520	GN17Monmouth
DRIL78.260	2	4	25	25	390	GN17Monmouth
M141A B1 Pl1 AOC	1	12	5	5	575	GN17Monmouth
M141A B1 Pl1 AOC	1	11	6	6	NA	GN17Monmouth
M141A B1 Pl1 AOC	1	5	15	15	390	GN17Monmouth
M141A B1 Pl1 AOC	1	10	17	17	NA	GN17Monmouth
M141A B1 Pl1 AOC	2	1	23	23	NA	GN17Monmouth
M141A B1 Pl1 AOC	2	1	24	24	NA	GN17Monmouth
M141A B1 Pl1 AOC	2	8	24	24	525	GN17Monmouth
M141A B1 Pl1 AOC	2	5	26	26	NA	GN17Monmouth
NC258	2	15	20	20	90	GN17Monmouth
NC258	2	15	21	21	110	GN17Monmouth
NC258	2	15	22	22	135	GN17Monmouth
NC258	2	15	23	23	70	GN17Monmouth
NC258	2	15	24	24	90	GN17Monmouth
NC258	2	15	25	25	75	GN17Monmouth
NC258	2	15	26	26	140	GN17Monmouth
NC258	2	15	27	27	190	GN17Monmouth
NC258	2	15	28	28	210	GN17Monmouth
NC258	2	15	29	29	135	GN17Monmouth
NC258	2	15	30	30	230	GN17Monmouth
NC258	2	15	31	31	70	GN17Monmouth
NC258	2	15	32	32	45	GN17Monmouth
NC258	2	15	33	33	300	GN17Monmouth
NC258	2	15	34	34	0	GN17Monmouth
NC258	2	15	35	35	90	GN17Monmouth
NC258	2	15	36	36	25	GN17Monmouth
NC344	1	15	1	1	225	GN17Monmouth
NC344	1	15	2	2	180	GN17Monmouth
NC344	1	15	3	3	115	GN17Monmouth
NC344	1	15	4	4	295	GN17Monmouth
NC344	1	15	5	5	320	GN17Monmouth
NC344	1	15	6	6	165	GN17Monmouth
NC344	1	15	7	7	205	GN17Monmouth
NC344	1	15	8	8	350	GN17Monmouth
NC344	1	15	9	9	115	GN17Monmouth
NC344	1	15	10	10	115	GN17Monmouth
NC344	1	15	11	11	145	GN17Monmouth
NC344	1	15	12	12	280	GN17Monmouth
NC344	1	15	13	13	315	GN17Monmouth
NC344	1	15	14	14	335	GN17Monmouth
NC344	1	15	15	15	360	GN17Monmouth
NC344	1	15	16	16	320	GN17Monmouth
NC344	1	15	17	17	385	GN17Monmouth
NC344	1	15	18	18	340	GN17Monmouth
NC344	2	15	19	19	235	GN17Monmouth
Oh7B	1	14	1	1	340	GN17Monmouth
Oh7B	1	14	2	2	430	GN17Monmouth
Oh7B	1	14	3	3	320	GN17Monmouth
Oh7B	1	14	4	4	390	GN17Monmouth
Oh7B	1	14	5	5	430	GN17Monmouth
Oh7B	1	14	6	6	360	GN17Monmouth
Oh7B	1	14	7	7	435	GN17Monmouth
Oh7B	1	14	8	8	430	GN17Monmouth
Oh7B	1	14	9	9	365	GN17Monmouth
Oh7B	1	14	10	10	405	GN17Monmouth
Oh7B	1	14	11	11	340	GN17Monmouth
Oh7B	1	14	12	12	450	GN17Monmouth
Oh7B	1	14	13	13	430	GN17Monmouth
Oh7B	1	14	14	14	425	GN17Monmouth
Oh7B	1	14	15	15	500	GN17Monmouth
Oh7B	1	14	16	16	NA	GN17Monmouth
Oh7B	1	14	17	17	NA	GN17Monmouth
Oh7B	1	14	18	18	NA	GN17Monmouth
Oh7B	2	14	19	19	NA	GN17Monmouth
Oh7B	2	14	20	20	NA	GN17Monmouth
Oh7B	2	14	21	21	455	GN17Monmouth
Oh7B	2	14	22	22	575	GN17Monmouth
Oh7B	2	14	23	23	390	GN17Monmouth
Oh7B	2	14	24	24	665	GN17Monmouth
Oh7B	2	14	25	25	NA	GN17Monmouth
Oh7B	2	14	26	26	NA	GN17Monmouth
Oh7B	2	14	27	27	NA	GN17Monmouth
Oh7B	2	14	28	28	NA	GN17Monmouth
Oh7B	2	14	29	29	NA	GN17Monmouth
Oh7B	2	14	30	30	NA	GN17Monmouth
Oh7B	2	14	31	31	520	GN17Monmouth
Oh7B	2	14	32	32	550	GN17Monmouth
Oh7B	2	14	33	33	NA	GN17Monmouth
Oh7B	2	14	34	34	NA	GN17Monmouth
Oh7B	2	14	35	35	NA	GN17Monmouth
Oh7B	2	14	36	36	NA	GN17Monmouth
